# Supplementary material for: Multifunctional fluorescent leucomalachite green derivatives for chemodosimetric detection of Fe3+, specific imaging of lipid droplets and intracellular pH monitoring
Source: Royal Society of Chemistry journal article supplement (doi:10.1039/c9nj04267a), 2019-01-01
Supplement: c9nj04267a1.pdf [file c9nj04267a1.pdf]

## Supporting information

### **Multifunctional fluorescent leucomalachite green derivatives for chemodosimetric detection of Fe<sup>3+</sup>, specific imaging of lipid droplets and intracellular pH monitoring**

Thekke Thattariyil Divya<sup>a</sup>, Darpan Raghav<sup>b</sup>, Krishnan Rathinasamy<sup>b\*</sup>, Lakshmi Chakkumkumarath<sup>a\*</sup>

- a. Department of Chemistry, National Institute of Technology Calicut, Kerala, India-673601
- b. School of Biotechnology, National Institute of Technology Calicut, Kerala, India-673601

Corresponding Author: [lakshmic@nitc.ac.in](mailto:lakshmic@nitc.ac.in)

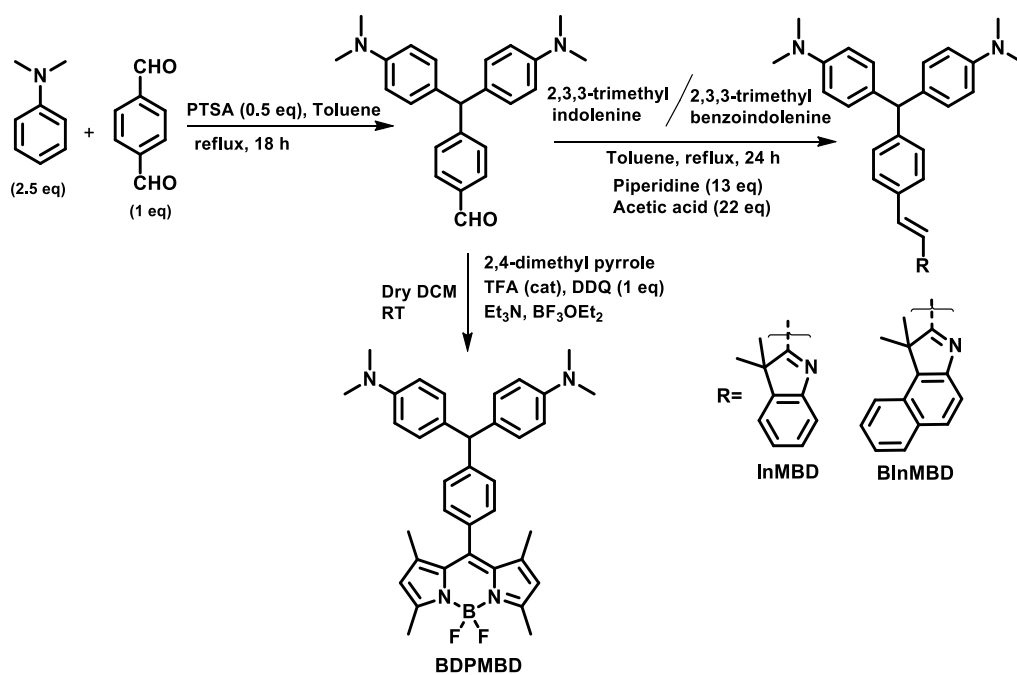

**Scheme S1.** Synthesis of leucomalachite green derivatives.

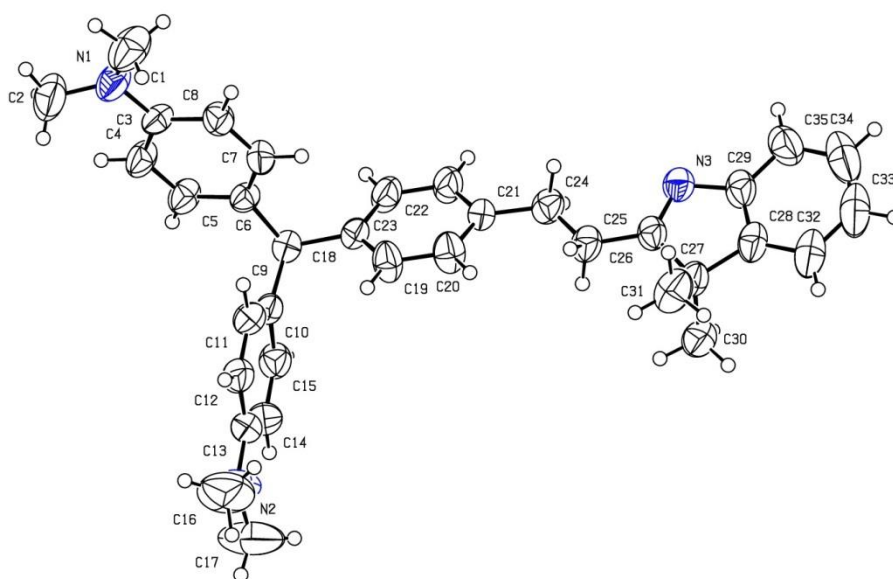

**Fig. S1** ORTEP diagram of InMBD.

**Table S1:** X-ray crystallographic data and structural refinement details of **InMBD**

| Identification code               | InMBD                                                                                                     |
|-----------------------------------|-----------------------------------------------------------------------------------------------------------|
| Empirical formula                 | C <sub>35</sub> H <sub>37</sub> N <sub>3</sub>                                                            |
| Formula weight                    | 499.67                                                                                                    |
| Temperature                       | 296(2) K                                                                                                  |
| Wavelength                        | 0.71073 Å                                                                                                 |
| Crystal system, space group       | Monoclinic, P21/n                                                                                         |
| Unit cell dimensions              | a = 13.777(3) Å alpha = 90 deg<br>b = 10.069(2) Å beta = 91.861(12)deg<br>c = 20.859(4) Å gamma = 90 deg. |
| Volume                            | 2892.2(11) Å <sup>3</sup>                                                                                 |
| Z, Calculated density             | 4, 1.148 Mg/m <sup>3</sup>                                                                                |
| Absorption coefficient            | 0.067 mm <sup>-1</sup>                                                                                    |
| F(000)                            | 1072                                                                                                      |
| Crystal size                      | 0.350 x 0.350 x 0.300 mm                                                                                  |
| Theta range for data collection   | 1.479 to 28.507 deg.                                                                                      |
| Limiting indices                  | -18<=h<=18, -13<=k<=9, -27<=l<=27                                                                         |
| Reflections collected / unique    | 23022 / 7049 [R(int) = 0.0936]                                                                            |
| Completeness to theta = 28.09     | 100.0 %                                                                                                   |
| Absorption correction             | Semi-empirical from equivalents                                                                           |
| Max. and min. Transmission        | 0.980 and 0.977                                                                                           |
| Refinement method                 | Full-matrix least-squares on F <sup>2</sup>                                                               |
| Data / restraints / parameters    | 7049 / 0 / 349                                                                                            |
| Goodness-of-fit on F <sup>2</sup> | 0.903                                                                                                     |
| Final R indices [I>2sigma(I)]     | R1 = 0.0677, wR2 = 0.1635                                                                                 |
| R indices (all data)              | R1 = 0.2335, wR2 = 0.2625                                                                                 |
| Largest diff. peak and hole       | 0.242 and -0.234 e.Å <sup>-3</sup>                                                                        |

### Detection of Fe<sup>3+</sup>

The probe as well as Fe<sup>3+</sup> stock solutions (0.01 M) were prepared in ethanol. 0-50 μM of Fe<sup>3+</sup> was added to fixed concentration of the probes in 3 mL cuvette and stirred for 2 min. The change in absorbance at 630 nm were recorded for each of these solutions. The calibration plots were drawn by plotting the change in absorbance as a function of concentration. Emission intensity at 501 nm, 433 nm and 455 nm respectively were used for **BDPMBD**, **InMBD** and **BInMBD**. The change in emission

intensity as a function of concentration were used for drawing calibration plot. The concentrations of the probes used for the study is given below.

Colorimetric study: **BDPMBD** ( $10^{-5}$  M), **InMBD** ( $2 \times 10^{-5}$  M), **BInMBD** ( $2 \times 10^{-5}$  M)

Emission study: **BDPMBD** ( $10^{-6}$  M), **InMBD** ( $5 \times 10^{-5}$  M), **BInMBD** ( $5 \times 10^{-5}$  M)

### **Details of cyclic voltammetry experiments**

The electrochemical studies of the compounds were performed in acetonitrile containing 0.1M tetrabutylammonium hexafluorophosphate as the supporting electrolyte at a scan rate of 100  $\text{mVs}^{-1}$  under nitrogen atmosphere. The concentrations of the samples were maintained as  $10^{-3}$  M. The electrodes used in the study were platinum (working), platinum wire (auxiliary) and Ag/AgCl (aq) (standard) electrodes.

### **Cell Imaging studies**

Minimal essential medium (MEM), cell culture tested antibiotic and antimycotic solution, phosphate-buffered saline (PBS), tryptone, yeast extract, peptone, glucose, ammonium sulphate, dimethyl sulfoxide (DMSO), sodium chloride, and glycerol were obtained from HiMedia, Mumbai, India. Formaldehyde solution 37% was procured from MilliporeSigma (Burlington, Massachusetts, United States). Oleic acid and Hoechst 33342 was obtained from Sigma-Aldrich. Fetal Bovine Serum (FBS) was obtained from Invitrogen, CA, USA. Fluorescence microscopic images were taken using Nikon (Tokyo, Japan) ECLIPSE Ti-E inverted fluorescence microscope using Cool SNAP digital camera and processed using Image J (NIH, Bethesda). In cell imaging, the sections were examined with Leica, TCS SP8 confocal microscope.

### **Organisms used in the biological study and growth conditions**

Human cervical cancer cells (HeLa) were obtained from National Centre for Cell Science (NCCS), Pune, India. HeLa cells were grown in MEM supplemented with 10% (v/v) FBS, sodium bicarbonate and 1% antibiotic-antimycotic solution containing 100 units of penicillin, 100  $\mu\text{g}$  of streptomycin, and 0.25  $\mu\text{g}$  of amphotericin B per mL. Cells were maintained in 25  $\text{cm}^2$  tissue culture flasks at 37  $^{\circ}\text{C}$  in a humidified atmosphere of 5%  $\text{CO}_2$  and 95% air.

Laboratory strain of Baker's yeast *Saccharomyces cerevisiae* was grown in aerobic conditions in a defined YPD medium supplemented with 1% yeast extract, 2% peptone, and 2% glucose. To enhance the lipid production profile inside the yeast cells, the cells were separately grown in a modified medium containing 2% peptone, ammonium sulfate (3 g/L) as the sole nitrogen source, oleic acid (50  $\mu\text{M}$ ) and glycerol (100 g/L) as a sole carbon source. *Escherichia coli* (EC) (BL21 (DE3)) and *Bacillus subtilis* 168 (BS) were grown in aerobic conditions in a liquid medium supplemented with yeast extract (0.5%), tryptone (1.5%), and NaCl (1%)

### **Localization studies of the compounds in HeLa cells using fluorescence microscopy**

To study the localization of compounds **InMBD**, **BInMBD**, and **BDPMBD**, HeLa cells at a density of  $0.5 \times 10^5$  cells/mL were seeded on poly-L-lysine coated glass cover slips in 24-well tissue culture plates. Next day, the cells were incubated with each of these compounds (50  $\mu$ M) separately for 24 h. The cells were then washed twice with 1xPBS to remove the excess un-internalized compounds. Further, the cells were fixed with 3.7% formaldehyde and were subsequently stained with nuclear stain Hoechst 33342 (1.5  $\mu$ g/mL). [The localization in live HeLa cells was studied by incubating the HeLa cells with compounds **BDPMBD** (100  $\mu$ M), **BInMBD** (100  $\mu$ M), and **InMBD** (100  $\mu$ M).] The cover slips containing fixed & live cells were mounted on clean glass slides and the cells were observed using an inverted fluorescence microscope.

### **Confocal imaging in live HeLa and DLD cells**

The localization of the compounds in the live HeLa cells and DLD cells ( $0.5 \times 10^5$  cell/mL) were studied by incubating the cells with **BDPMBD** (100  $\mu$ M). After 18 h of incubation, the cells were subsequently stained with Nile red (0.3  $\mu$ M). Then the cells were washed twice with 1xPBS to remove the excess un-internalized compounds. The coverslips containing the live cells were then mounted on clean glass slides and the cells were observed under a confocal fluorescence microscope using different emission filters.

### **pH sensing studies of InMBD, BInMBD, and BDPMBD in Baker's yeast, *Escherichia coli*, and *Bacillus subtilis* cells.**

Briefly, yeast, *E. coli* and *B. subtilis* cells were separately incubated with a fixed concentration (100  $\mu$ M) of the compounds for 4 h. The cells were then harvested and washed twice with 1xPBS. Further, the cells were fixed with 4% formaldehyde solution for 30 min at RT. After this, the cell suspension was centrifuged and the supernatant containing 4% formaldehyde solution was decanted. The yeast and bacterial cells were then incubated with buffer solutions ranging from pH 1-9 for 1 h at room temperature to equilibrate the intracellular pH with the pH of the buffers.

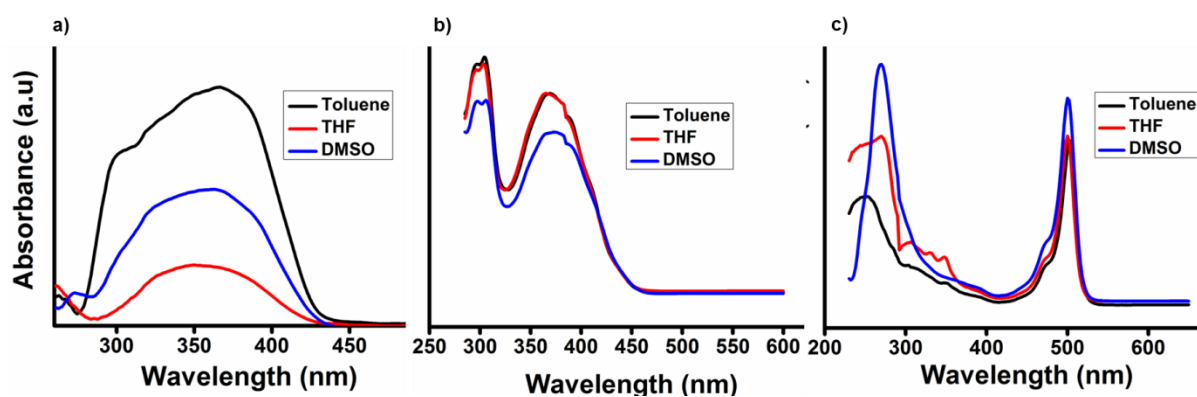

**Fig. S2** Absorption spectra of  $5 \times 10^{-5}$  M solution of a) **InMBD**, b) **BInMBD**, & c) **BDPMBD** in different solvents.

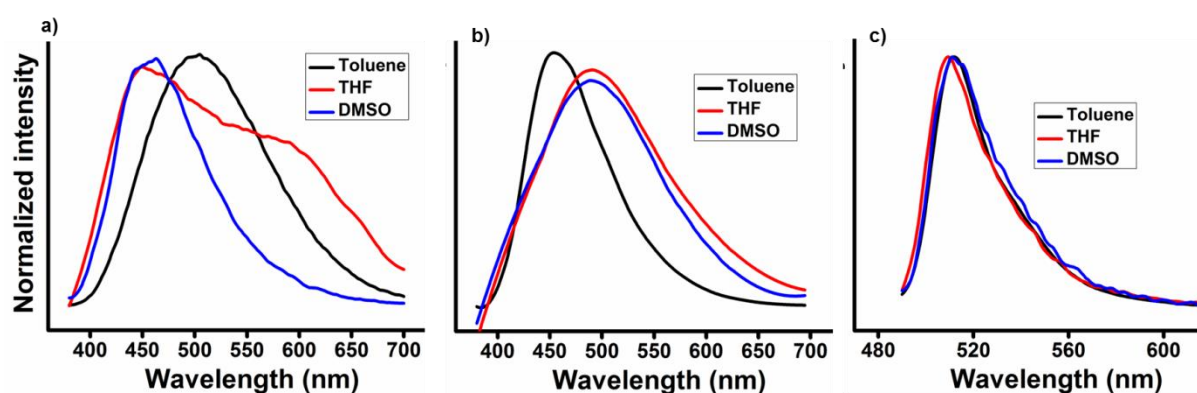

**Fig. S3** Emission spectra of  $5 \times 10^{-5}$  M solution of a) **InMBD**, b) **BInMBD**, & c) **BDPMBD** in different solvents.

**Table S2.** Spectral data of **InMBD** in different solvents.

| Solvent       | Absorbance (nm) | Emission (nm) | Stokes shift (nm) | Quantum yield* | Quantum yield at pH=2* |
|---------------|-----------------|---------------|-------------------|----------------|------------------------|
| Toluene       | 365             | 502           | 137               | 0.223          |                        |
| THF           | 357             | 450           | 93                | 0.041          | 0.090                  |
| Ethyl acetate | 354             | 507           | 153               | 0.043          |                        |
| Acetonitrile  | 354             | 450           | 96                | 0.034          | 0.078                  |
| DMF           | 357             | 444           | 87                | 0.053          |                        |
| DMSO          | 362             | 463           | 101               | 0.032          | 0.069                  |

\*Quantum yield measurements were done using quinine sulphate as the standard.

**Table S3.** Spectral data of **BInMBD** in different solvents.

| Solvent       | Absorbance (nm) | Emission (nm) | Stokes shift (nm) | Quantum yield* | Quantum yield at pH=2* |
|---------------|-----------------|---------------|-------------------|----------------|------------------------|
| Toluene       | 367             | 455           | 88                | 0.154          |                        |
| THF           | 367             | 490           | 123               | 0.073          | 0.168                  |
| Ethyl acetate | 364             | 492           | 128               | 0.057          |                        |
| Acetonitrile  | 362             | 493           | 131               | 0.037          | 0.124                  |
| DMF           | 366             | 487           | 121               | 0.082          |                        |
| DMSO          | 373             | 490           | 117               | 0.040          | 0.160                  |

\*Quantum yield measurements were done using quinine sulphate as the standard.

**Table S4.** Spectral data of **BDPMBD** in different solvents.

| Solvent       | Absorbance (nm) | Emission (nm) | Stokes shift (nm) | Quantum yield* | Quantum yield at pH=2* |
|---------------|-----------------|---------------|-------------------|----------------|------------------------|
| Toluene       | 502             | 512           | 10                | 0.58           |                        |
| THF           | 500             | 510           | 10                | 0.202          |                        |
| Ethyl acetate | 498             | 507           | 9                 | 0.311          |                        |
| Acetonitrile  | 496             | 507           | 11                | 0.136          |                        |
| DMF           | 500             | 510           | 10                | 0.103          |                        |
| DMSO          | 500             | 511           | 11                | 0.092          | 0.332                  |

\*Quantum yield measurements were done using quinine sulphate as the standard.

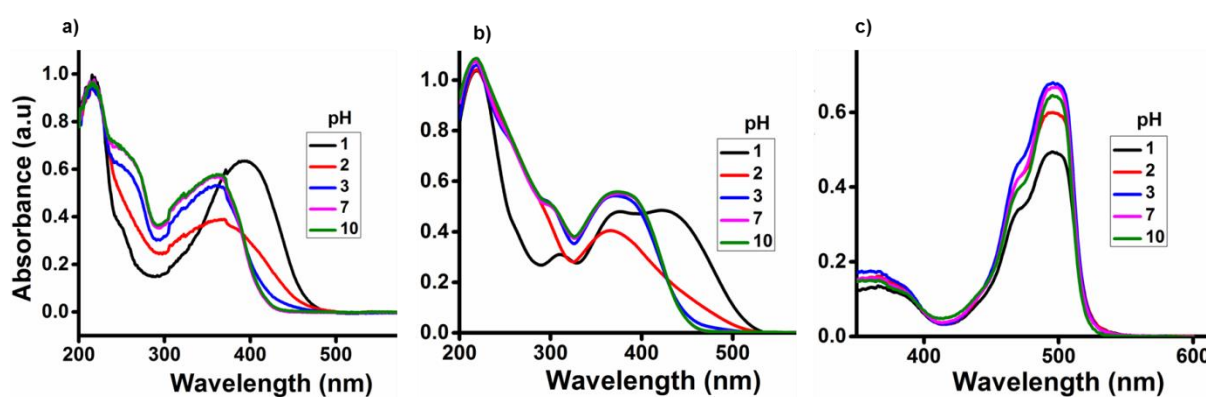**Fig. S4** pH-dependent absorption spectra of  $5 \times 10^{-5}$  M solution of a) **InMBD** b) **BInMBD** & c) **BDPMBD** in acetonitrile (MeCN):BR buffer (1:1).

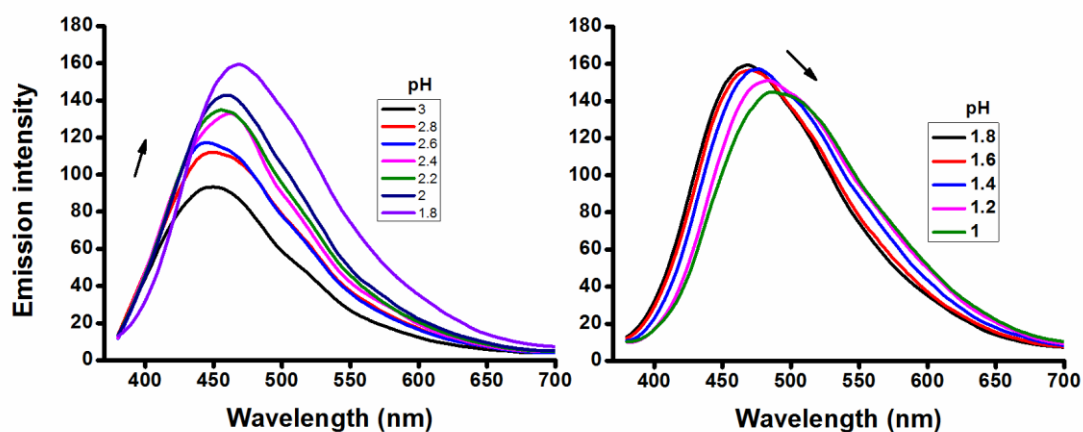

Fig. S5 pH-dependent emission spectra of  $5 \times 10^{-5}$  M solution of **InMBD** ( $\lambda_{\text{ex}} = 360$  nm).

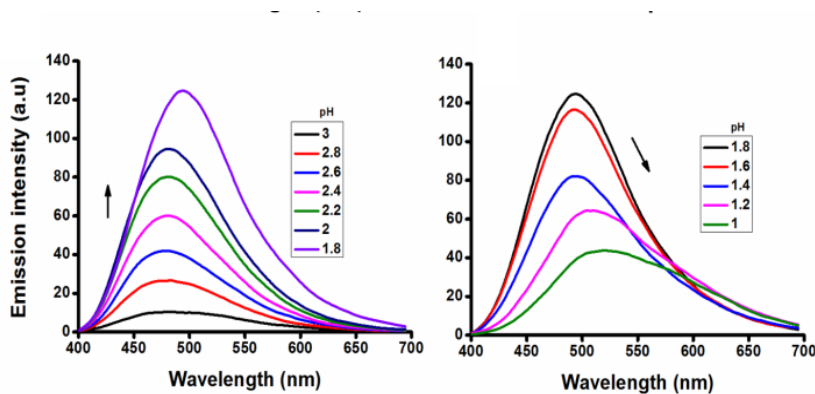

Fig. S6 pH-dependent emission spectra of  $5 \times 10^{-5}$  M solution of **BInMBD** ( $\lambda_{\text{ex}} = 360$  nm).

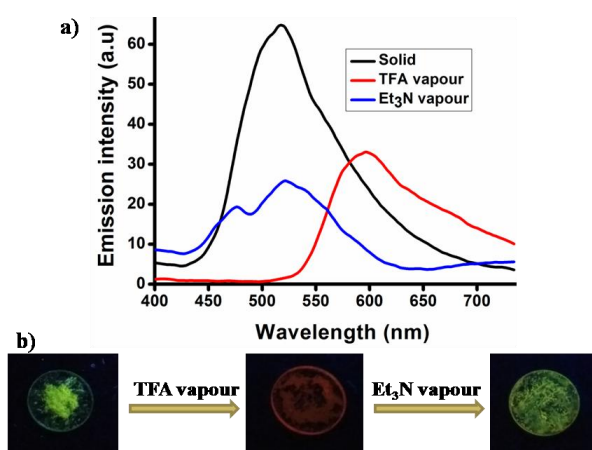

Fig. S7 a) Emission spectra of solid **BInMBD** on exposure to acid and base vapours b) photograph under UV light of 365 nm.



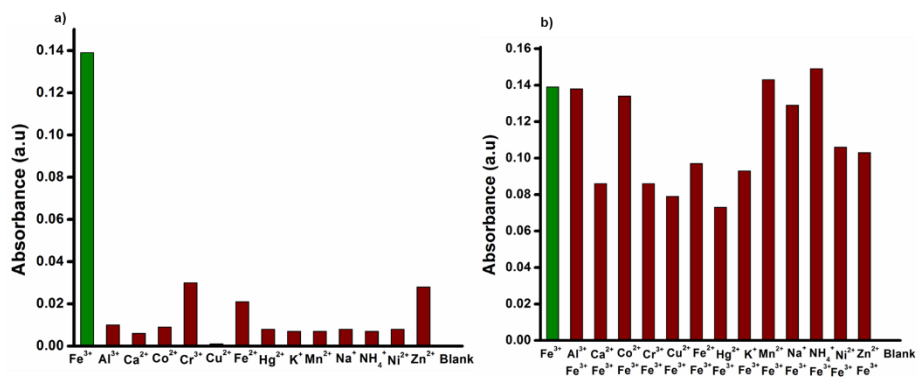

**Fig. S8** a) The selectivity and b) competitive selectivity of **InMBD** (20 μM) towards Fe<sup>3+</sup> (absorbance at 630 nm; Fe<sup>3+</sup> (5eq), Cr<sup>3+</sup>, Cu<sup>2+</sup>, Fe<sup>2+</sup> (each 10 eq) and other metal ions (100 eq) were used).

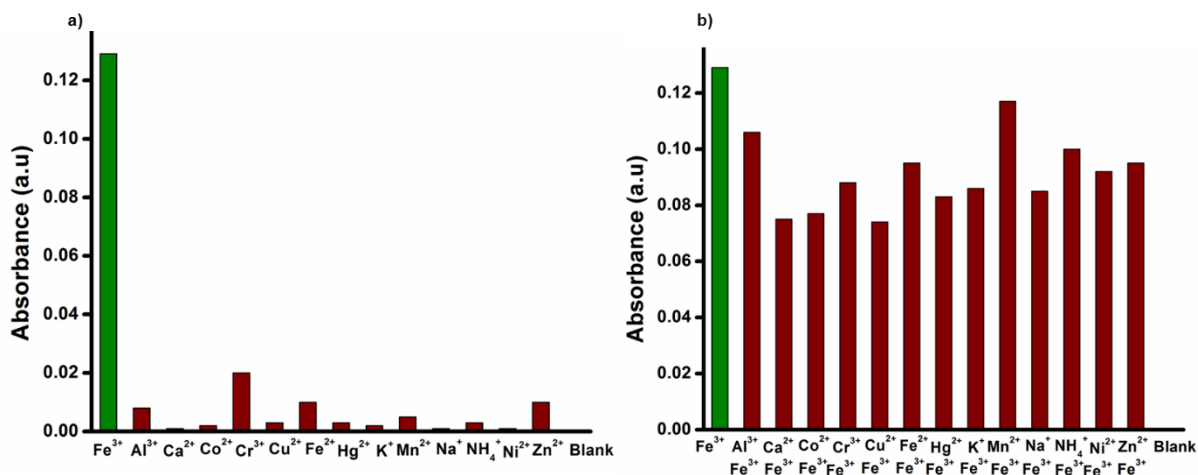

**Fig. S9** a) The selectivity and b) competitive selectivity of **BInMBD** (20 μM) towards Fe<sup>3+</sup> (absorbance at 630 nm; Fe<sup>3+</sup> (5eq), Cr<sup>3+</sup>, Cu<sup>2+</sup>, Fe<sup>2+</sup> (each 10 eq) and other metal ions (100 eq) were used).

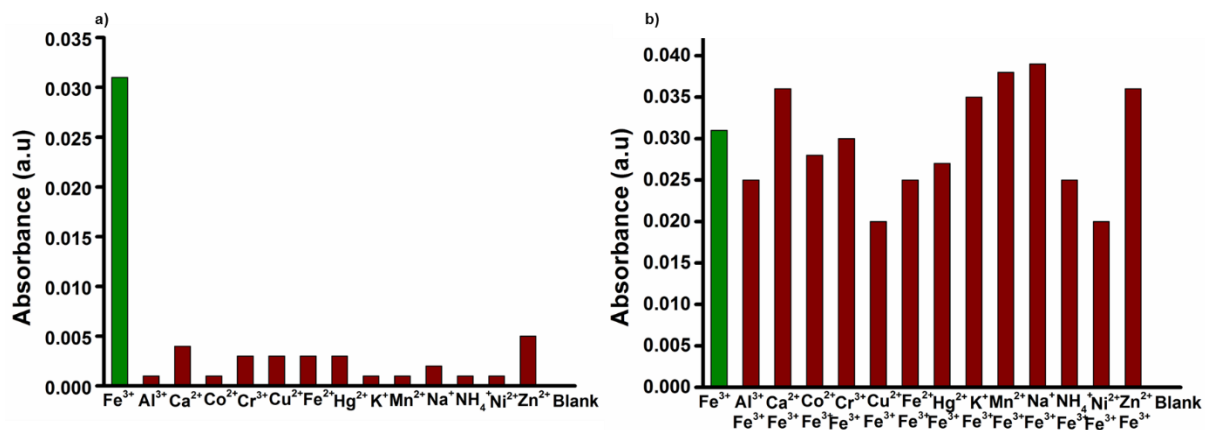

**Fig. S10** a) The selectivity and b) competitive selectivity of **BDPMBD** (10 μM) towards Fe<sup>3+</sup> (absorbance at 630 nm; Fe<sup>3+</sup> (5eq), Cr<sup>3+</sup>, Cu<sup>2+</sup>, Fe<sup>2+</sup> (each 10 eq) and other metal ions (100 eq) were used).

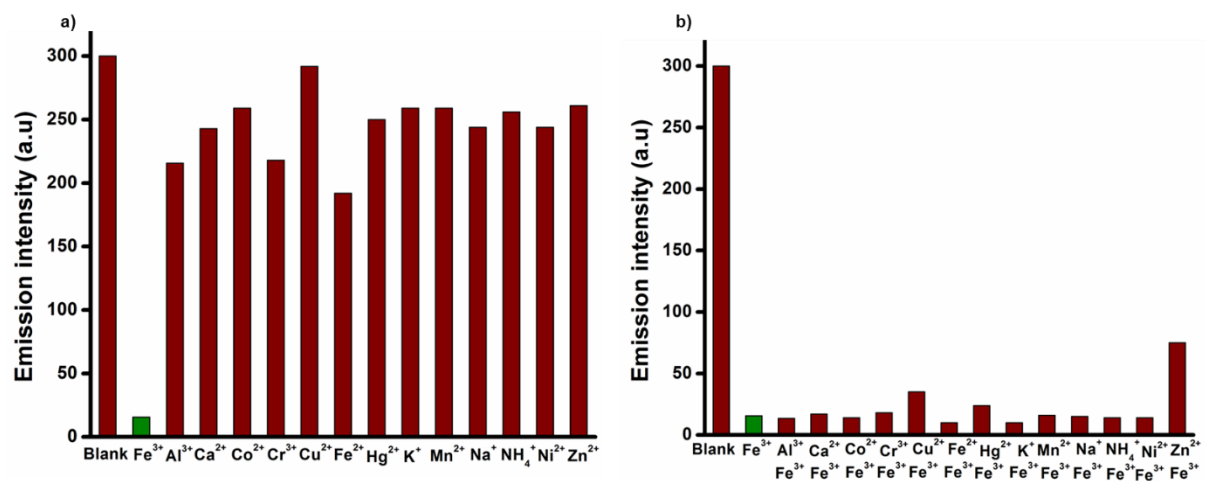

**Fig. S11** a) The selectivity and b) competitive selectivity of **InMBD** (20 μM) towards Fe<sup>3+</sup> (emission at 417 nm; Fe<sup>3+</sup> (5eq), Cr<sup>3+</sup>, Cu<sup>2+</sup>, Fe<sup>2+</sup> (each 10 eq) and other metal ions (100 eq) were used).

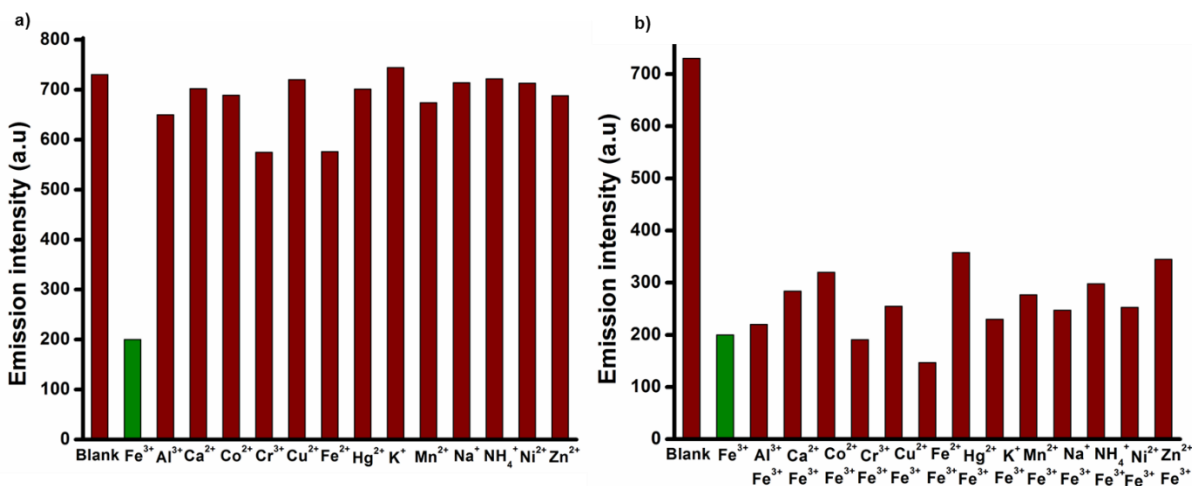

**Fig. S12** a) The selectivity and b) competitive selectivity of **BInMBD** (20 μM) towards Fe<sup>3+</sup> (emission at 444 nm; Fe<sup>3+</sup> (5eq), Cr<sup>3+</sup>, Cu<sup>2+</sup>, Fe<sup>2+</sup> (each 10 eq) and other metal ions (100 eq) were used).

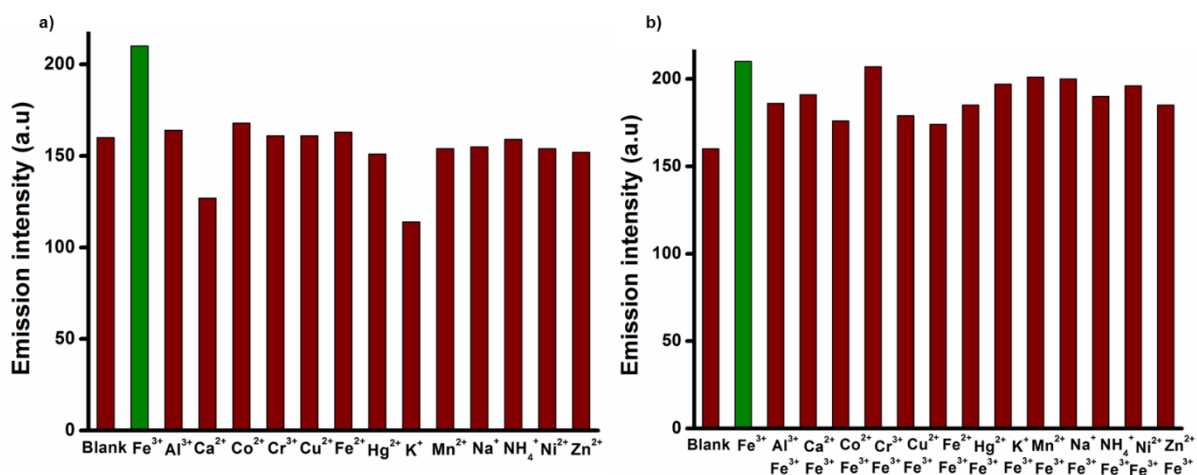

**Fig. S13** a) The selectivity and b) competitive selectivity of **BDPMBD** (10 μM) towards Fe<sup>3+</sup> (emission at 498 nm; Fe<sup>3+</sup> (5eq), Cr<sup>3+</sup>, Cu<sup>2+</sup>, Fe<sup>2+</sup> (each 10 eq) and other metal ions (100 eq) were used).

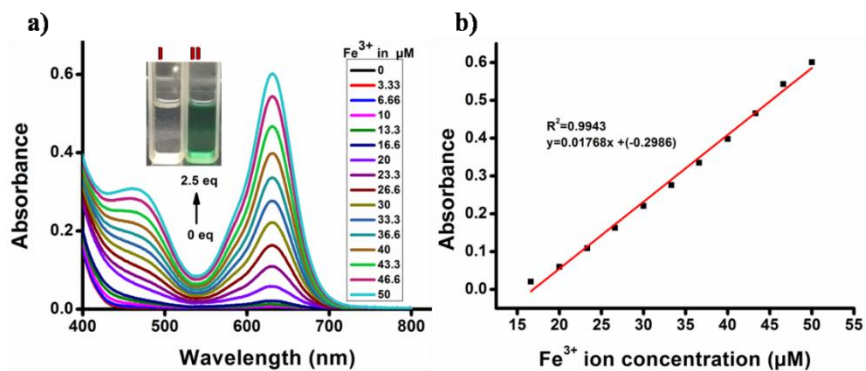

**Fig. S14** a) Absorption spectra of  $2 \times 10^{-5}$  M solution of **InMBD** in the presence of varying amounts of  $\text{Fe}^{3+}$ ; Inset: I-before & II- after addition of  $\text{Fe}^{3+}$  & b) the corresponding calibration plot.

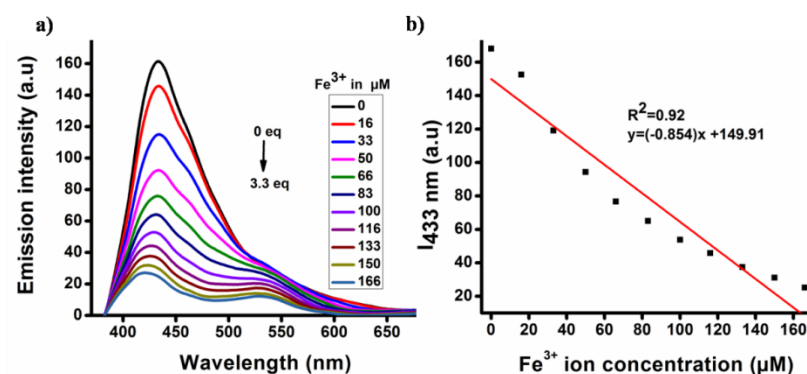

**Fig. S15** a) Emission spectra of  $5 \times 10^{-5}$  M solution of **InMBD** in presence of varying amounts of  $\text{Fe}^{3+}$  & b) the corresponding calibration plot.

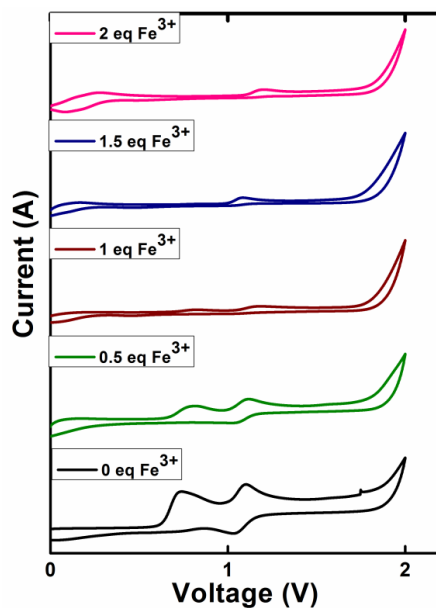

**Fig. S16** Cyclic voltammogram of **InMBD** with varying concentration of  $\text{Fe}^{3+}$ . Scan rate = 100 mV/s, V vs  $\text{Ag}/\text{Ag}^+(\text{aq})$ .

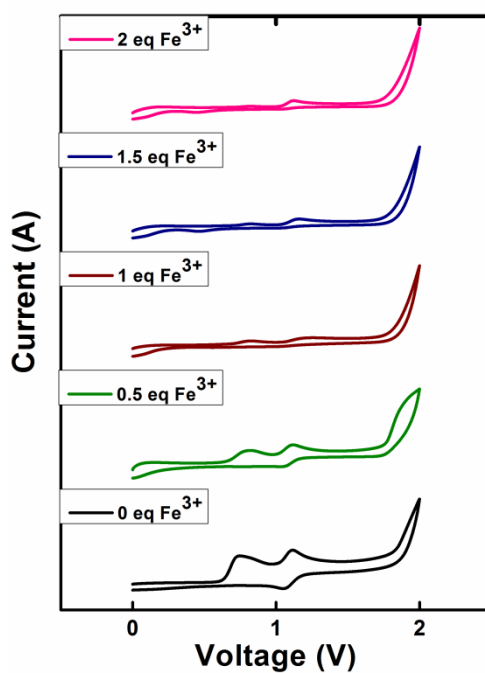

**Fig. S17** Cyclic voltammogram of **BIInMBD** with varying concentration of Fe<sup>3+</sup>. Scan rate = 100 mV/s, V vs Ag/Ag<sup>+</sup><sub>(aq)</sub>.

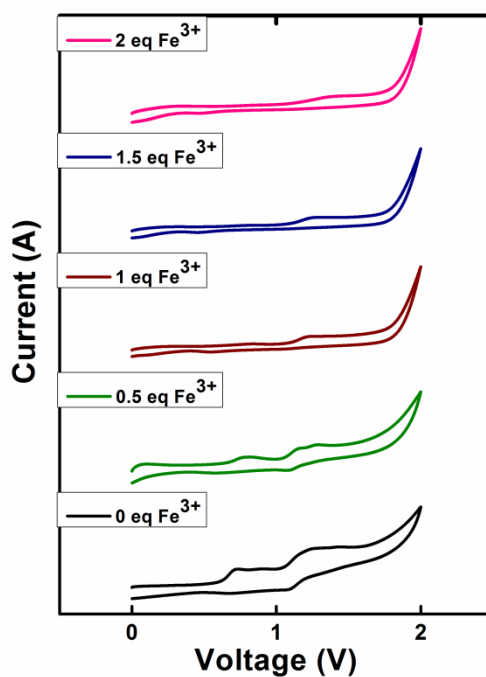

**Fig. S18** Cyclic voltammogram of **BDPMBD** with varying concentration of Fe<sup>3+</sup>. Scan rate = 100 mV/s, V vs Ag/Ag<sup>+</sup><sub>(aq)</sub>.

### **Determination of cytotoxicity using Sulforhodamine B (SRB) assay**

The effect of the compounds **BDPMBD**, **BInMBD**, and **InMBD** on the proliferation of HeLa cells was determined by performing the standard SRB assay. Briefly, HeLa cells were seeded in the 96-well plates at a seeding density of  $0.5 \times 10^5$  cells/mL. After 24 h, the medium of the cells was changed and the fresh medium containing different concentrations (0-300  $\mu$ M) of **BDPMBD**, **BInMBD**, or **InMBD** was added. The cells were then allowed to grow in the presence of the compounds for one cell cycle. After 24 h, the cells were fixed with 10% trichloroacetic acid and were subsequently stained with 0.4% SRB for 1 h. The cell-bound dye was then extracted with 10 mM Tris base (pH 10.5) and the optical density at 560 nm was determined using 96-well micro plate reader. The percentage inhibition of cell proliferation was determined as described previously.

### **The compounds BDPMBD, BInMBD, and InMBD induced minimal toxicity in HeLa cells**

The effect of the compounds **BDPMBD**, **InMBD**, and **BInMBD** on the proliferation of HeLa cells was determined using SRB assay. It is evident from Fig. S19 A that the compound **BDPMBD** inhibited proliferation of HeLa cells in a concentration dependent manner with an  $IC_{50}$  value of 270  $\mu$ M. Increasing concentrations of the compound **BDPMBD** such as 40, 80, 100, 150, 200, and 300  $\mu$ M inhibited the proliferation of HeLa cells by 2, 10, 15, 24, 36, and 56% respectively. The compound **BInMBD** inhibited the proliferation of HeLa cells with an  $IC_{50}$  value of 240  $\mu$ M. Increasing concentrations of the compound **BInMBD** such as 40, 80, 100, 150, 200, and 300  $\mu$ M inhibited the proliferation of HeLa cells by 13, 24, 29, 33, 45, and 55% respectively (Fig. S19 B). The compound **InMBD** inhibited the proliferation of HeLa cells with an  $IC_{50}$  value of 215  $\mu$ M. Increasing concentrations of the compound **InMBD** such as 40, 80, 100, 150, 200, and 300  $\mu$ M inhibited the proliferation of HeLa cells by 19, 21, 27, 36, 46, and 69% respectively (Fig. S19 C). Our results indicate that the compound **InMBD** ( $IC_{50}$  value of 215  $\mu$ M) exhibited better anti-proliferative potency as compared to **BDPMBD** and **BInMBD** in the HeLa cells. Also the data indicates all the three compounds exhibited relatively higher  $IC_{50}$  values indicating that the exposure to these compounds caused minimal toxicity in the HeLa cells.

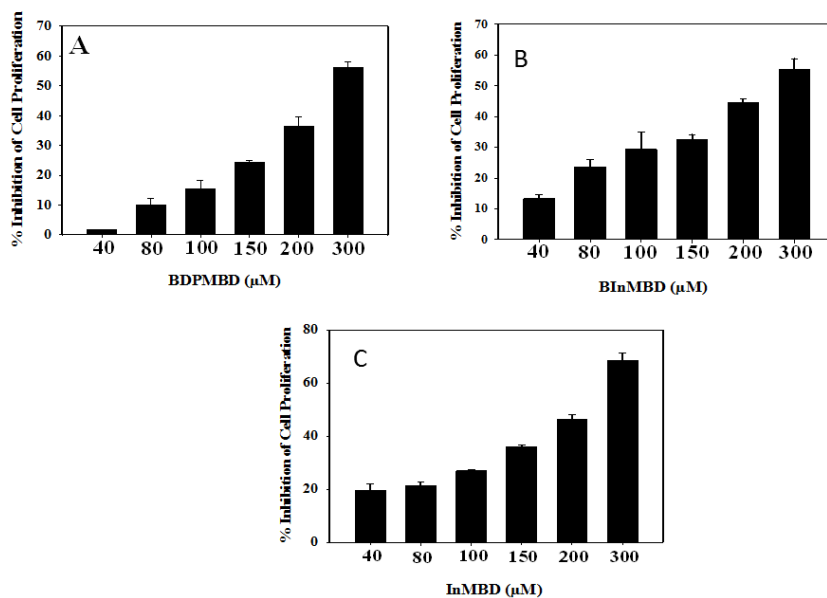

**Fig. S19** HeLa cells ( $0.5 \times 10^5$  cells/mL) were incubated in the absence and presence of the compounds A) **BDPMBD** B) **BInMBD** C) **InMBD** for 24 h and the percentage inhibition of cell proliferation was determined by using SRB assay. The experiment was performed three times. Error bars represent  $\pm$  SD.

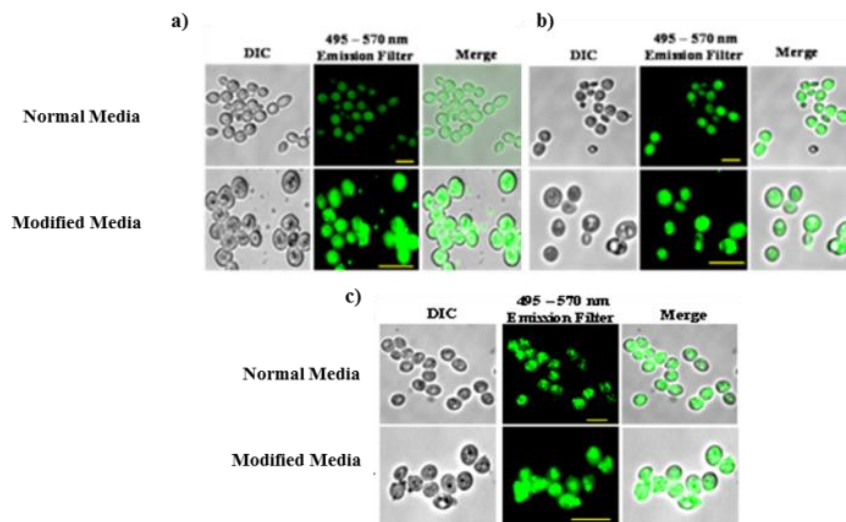

**Fig. S20** Cellular localization of compounds a) **InMBD** b) **BInMBD**, & c) **BDPMBD** in yeast cells. Scale bar = 10  $\mu$ m.

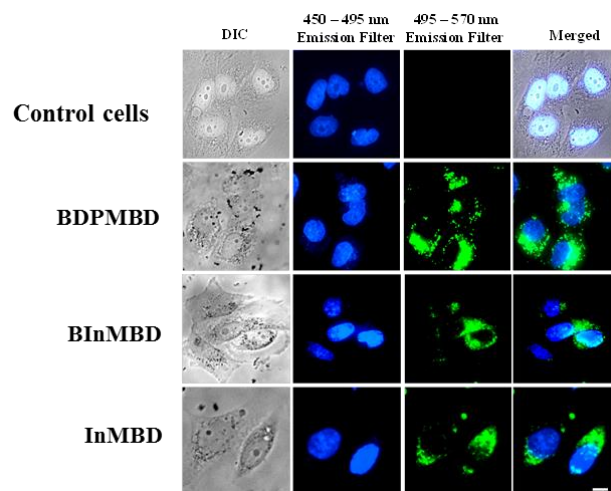

**Fig. S21** Cellular localization of the compounds **BDPMBD**, **BInMBD**, and **InMBD** in fixed HeLa cells. Scale bar =10  $\mu\text{m}$ .

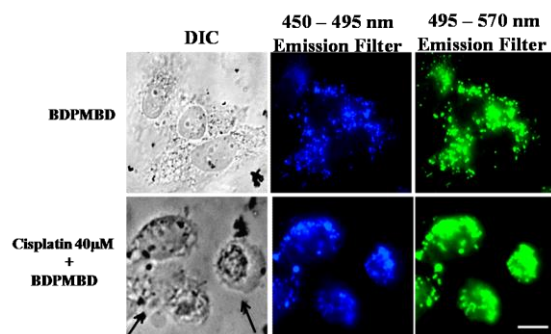

**Fig. S22** Detection of apoptotic cells using **BDPMBD**. Scale bar =10  $\mu\text{m}$ .



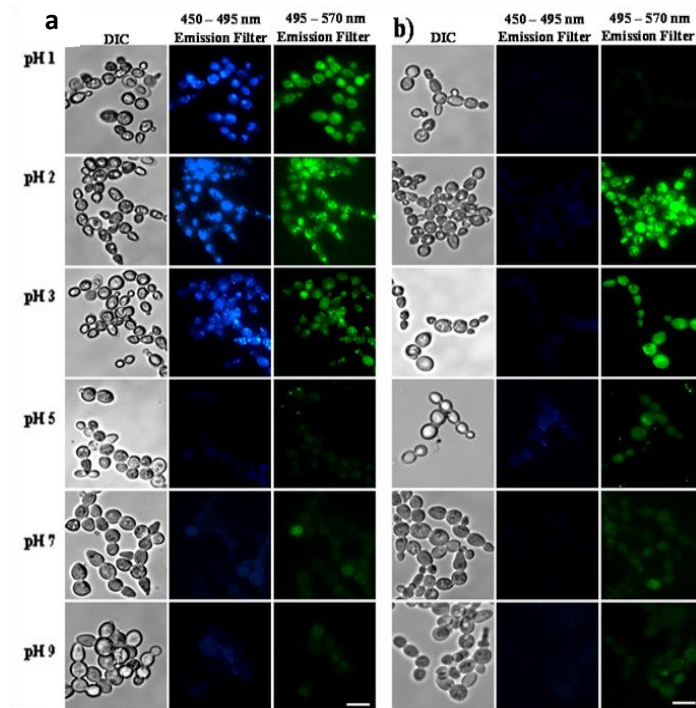

**Fig. S23** pH-dependent fluorescence switching of compounds a) **BInMBD** and b) **InMBD** in *S. cerevisiae* cells. Scale bar =10  $\mu\text{m}$ .

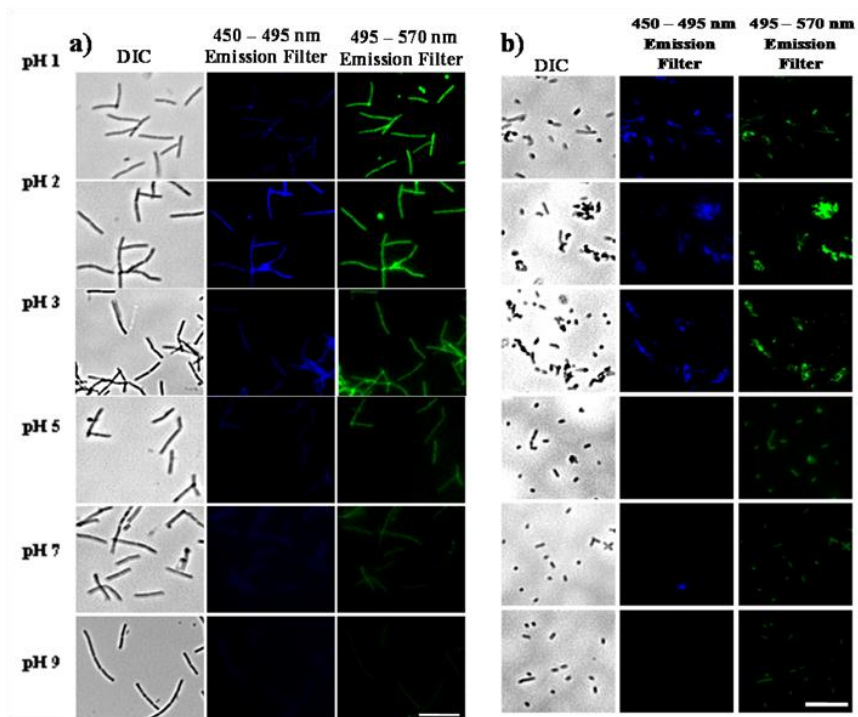

**Fig. S24** pH-dependent fluorescence switching of **BInMBD** in a) gram-positive bacteria *Bacillus subtilis* & b) gram-negative bacteria *E. coli*. Scale bar = 5  $\mu\text{m}$ .

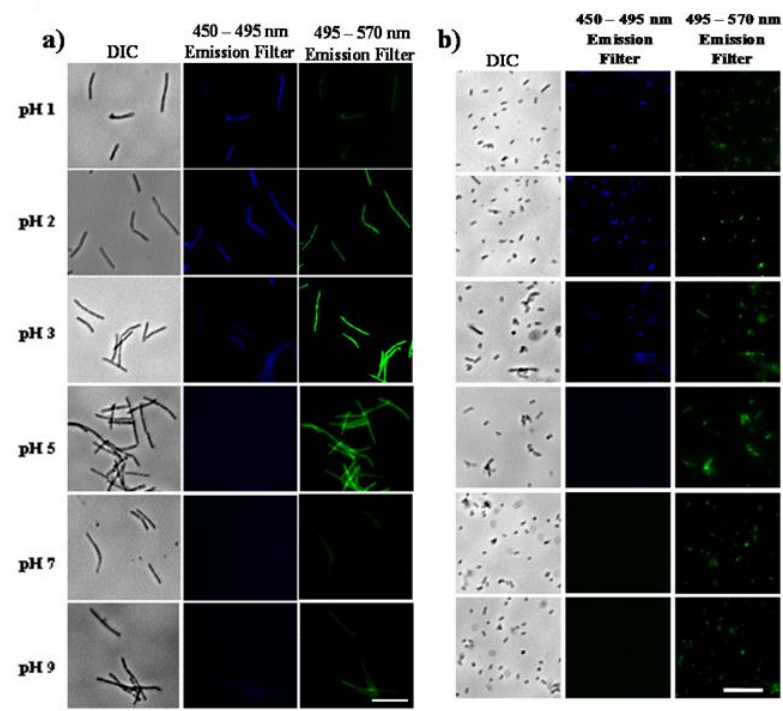

**Figure S25.** pH-dependent fluorescence switching of InMBD, in a) gram-positive bacteria *Bacillus subtilis* & b) gram-negative bacteria *E. coli*. Scale bar =5  $\mu\text{m}$ .

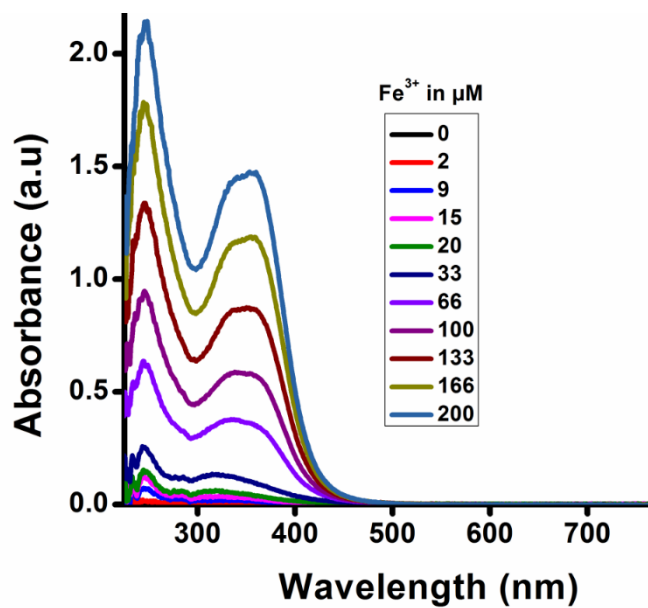

**Figure S26.** Absorption spectra of  $\text{Fe}^{3+}$  in ethanol at a concentration range of 0-200  $\mu\text{M}$ .

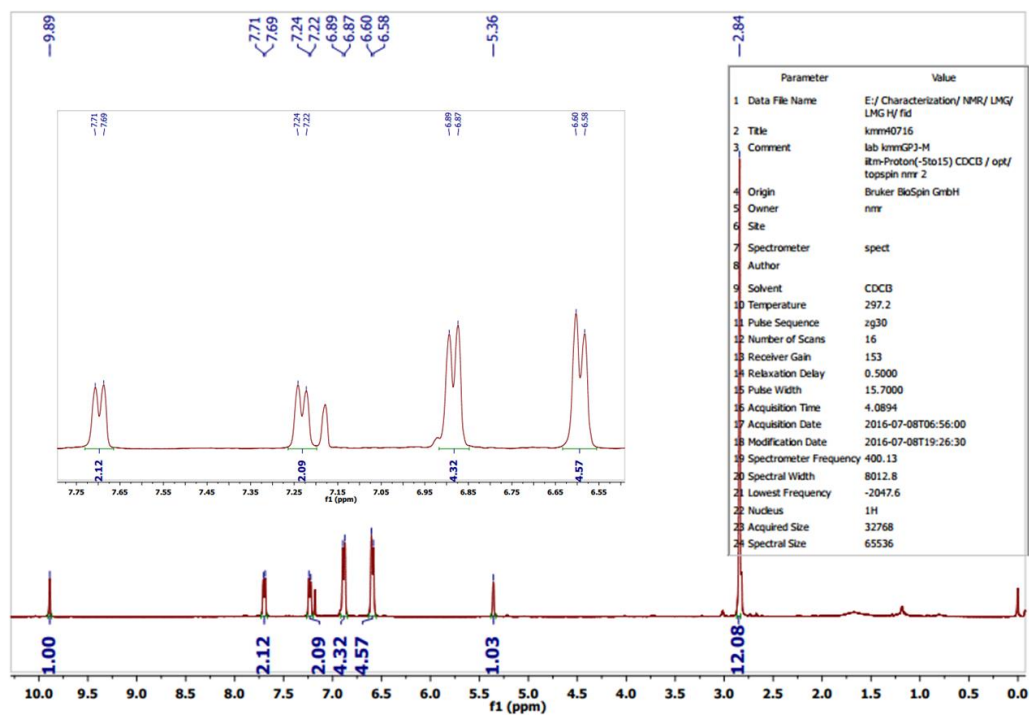

Fig. S27  $^1\text{H}$  NMR spectrum of LMG-CHO (400 MHz,  $\text{CDCl}_3$ ).

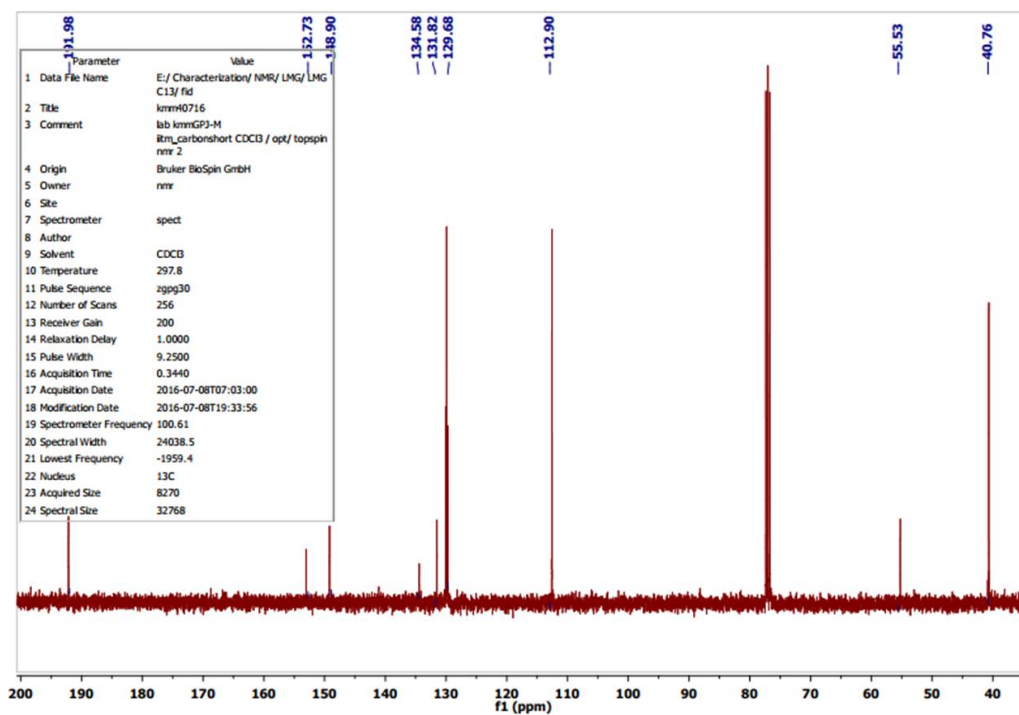

Fig. S28  $^{13}\text{C}$  NMR spectrum of LMG-CHO (100 MHz,  $\text{CDCl}_3$ ).

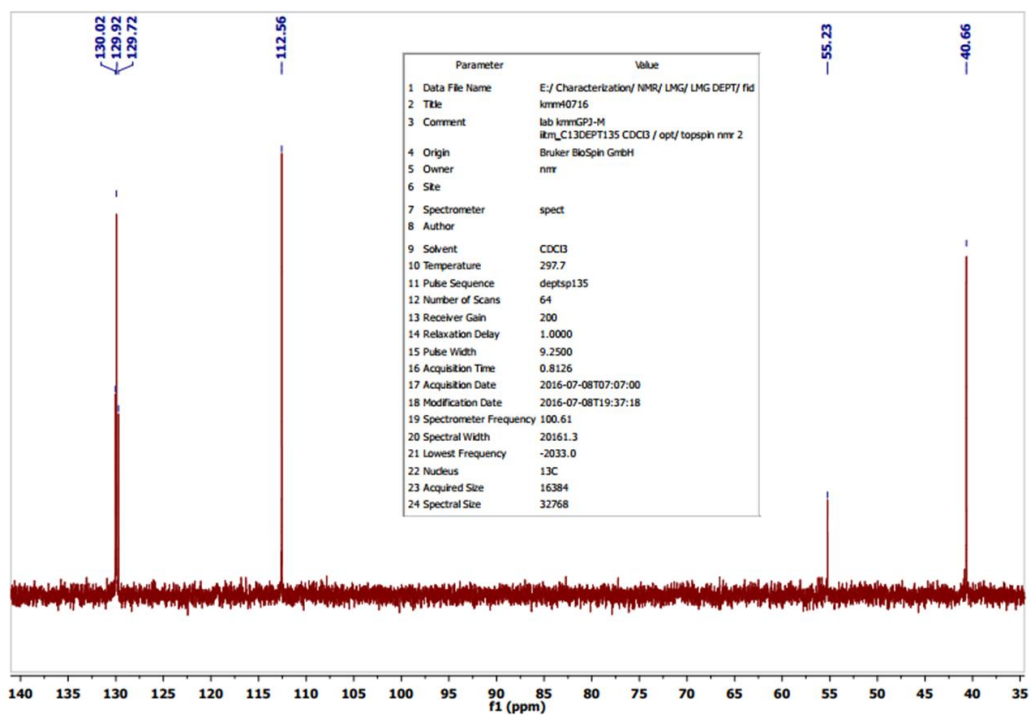

Fig. S29 DEPT-135 of LMG-CHO (100 MHz, CDCl<sub>3</sub>).

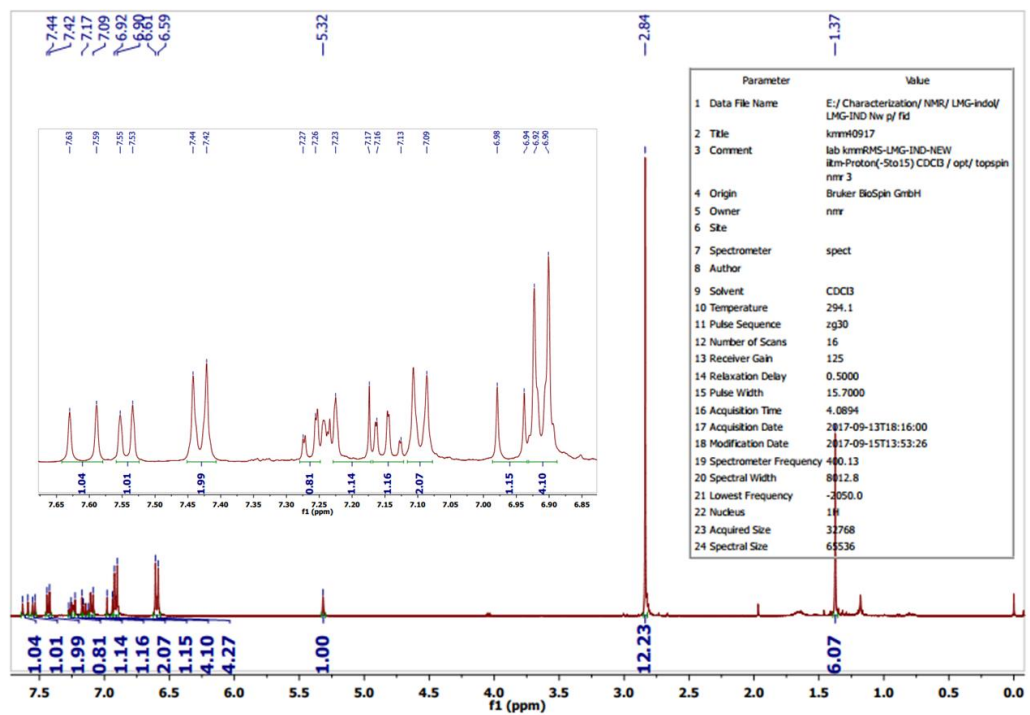

Fig. S30 <sup>1</sup>H NMR spectrum of InMBD (400 MHz, CDCl<sub>3</sub>).

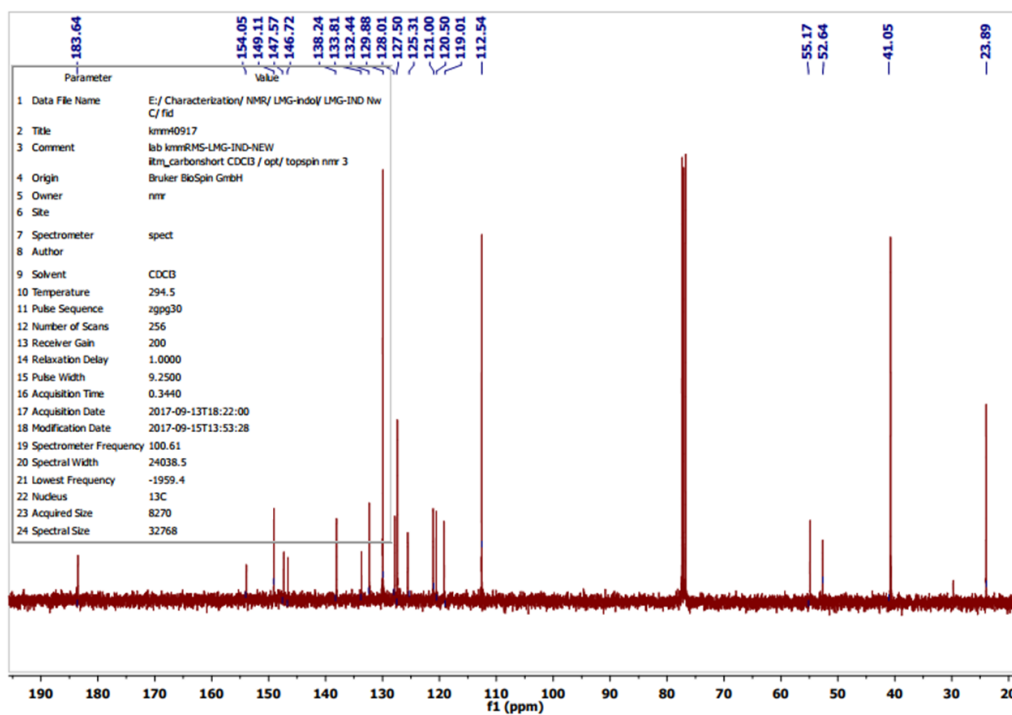

Fig. S31  $^{13}\text{C}$  NMR spectrum of InMBD (100 MHz,  $\text{CDCl}_3$ ).

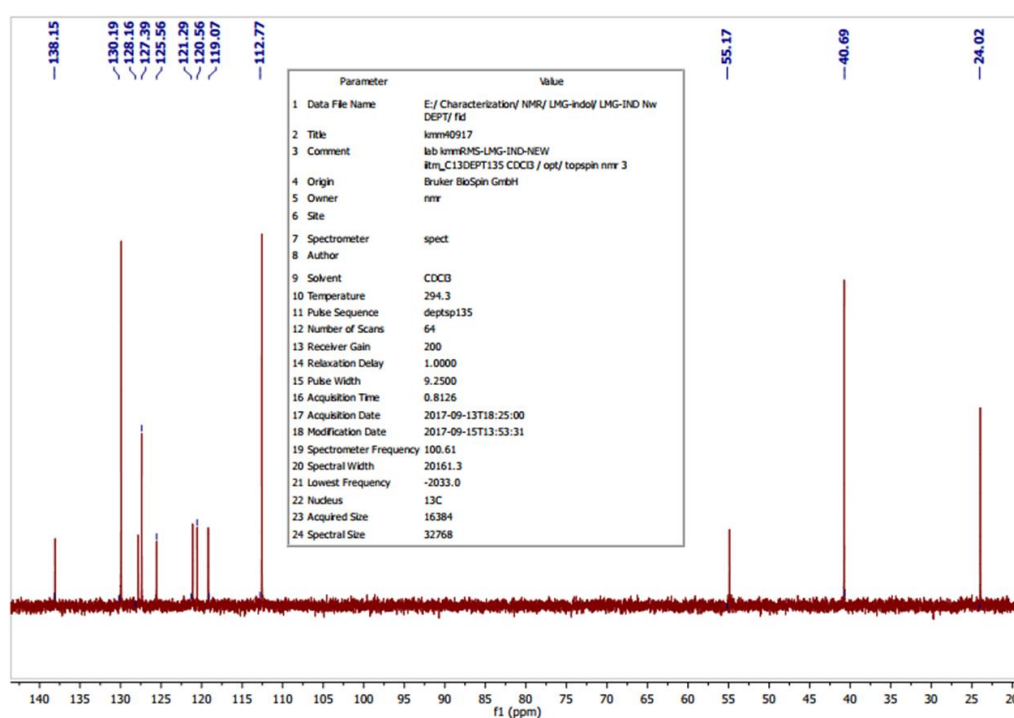

Fig. S32 DEPT-135 of InMBD (100 MHz,  $\text{CDCl}_3$ ).

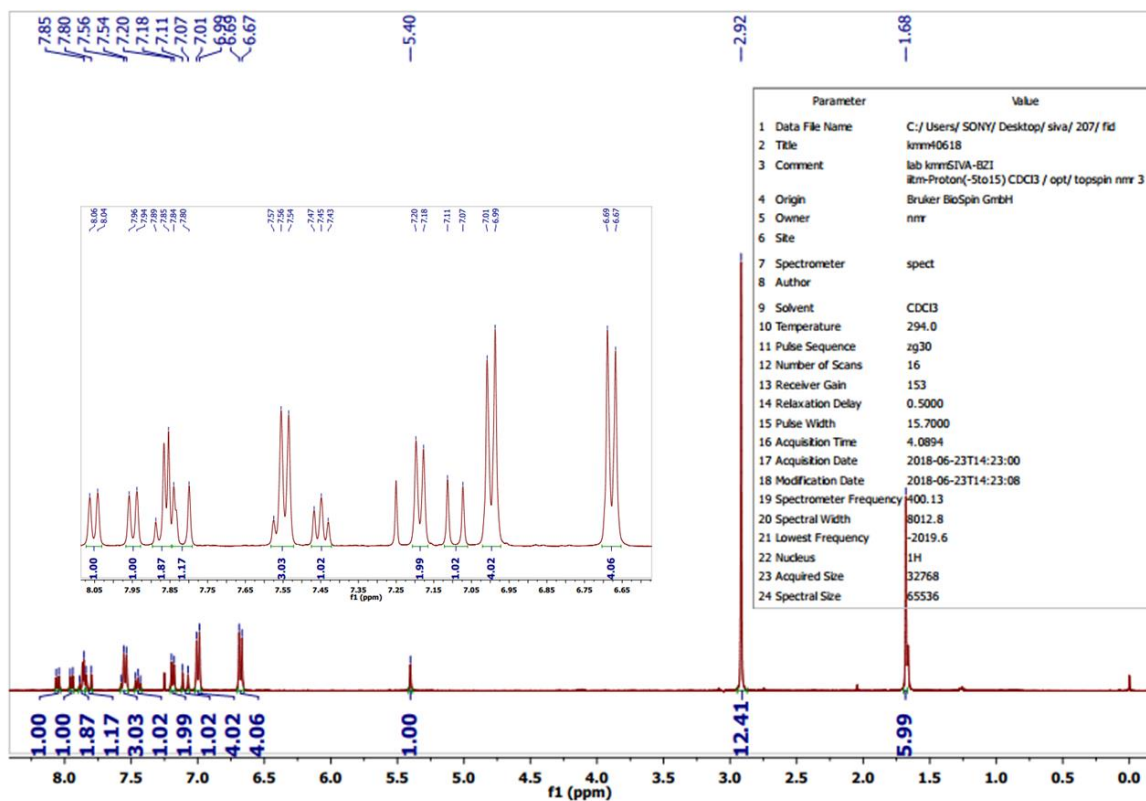

Fig. S33  $^1\text{H}$  NMR spectrum of **BInMBD** (400 MHz,  $\text{CDCl}_3$ ).

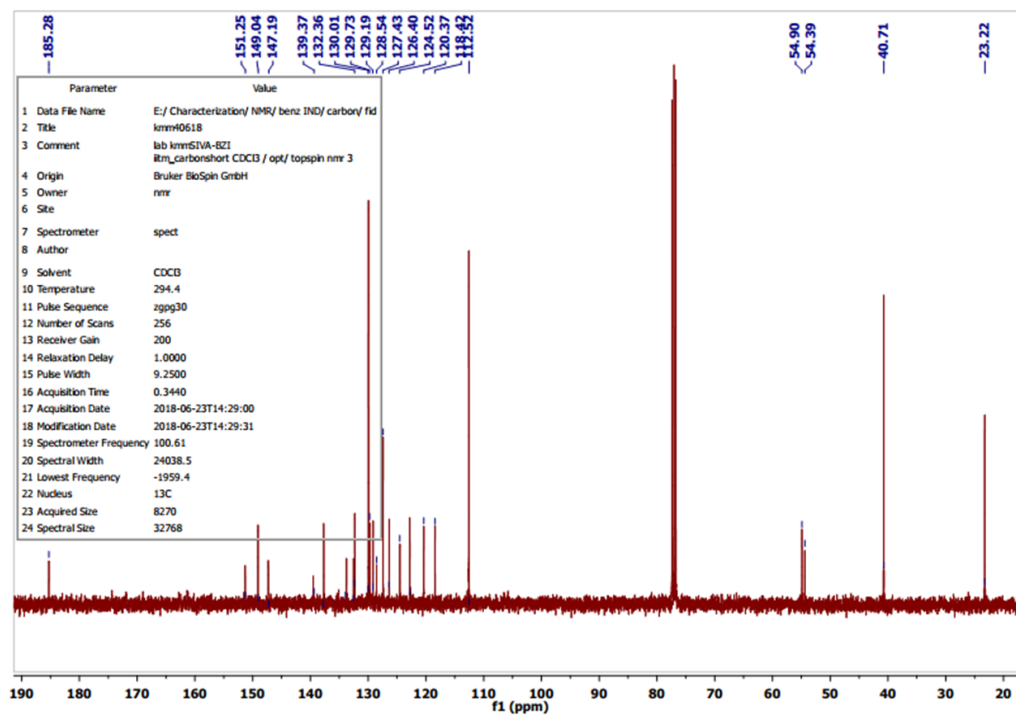

Fig. S34  $^{13}\text{C}$  NMR spectrum of **BInMBD** (100 MHz,  $\text{CDCl}_3$ ).



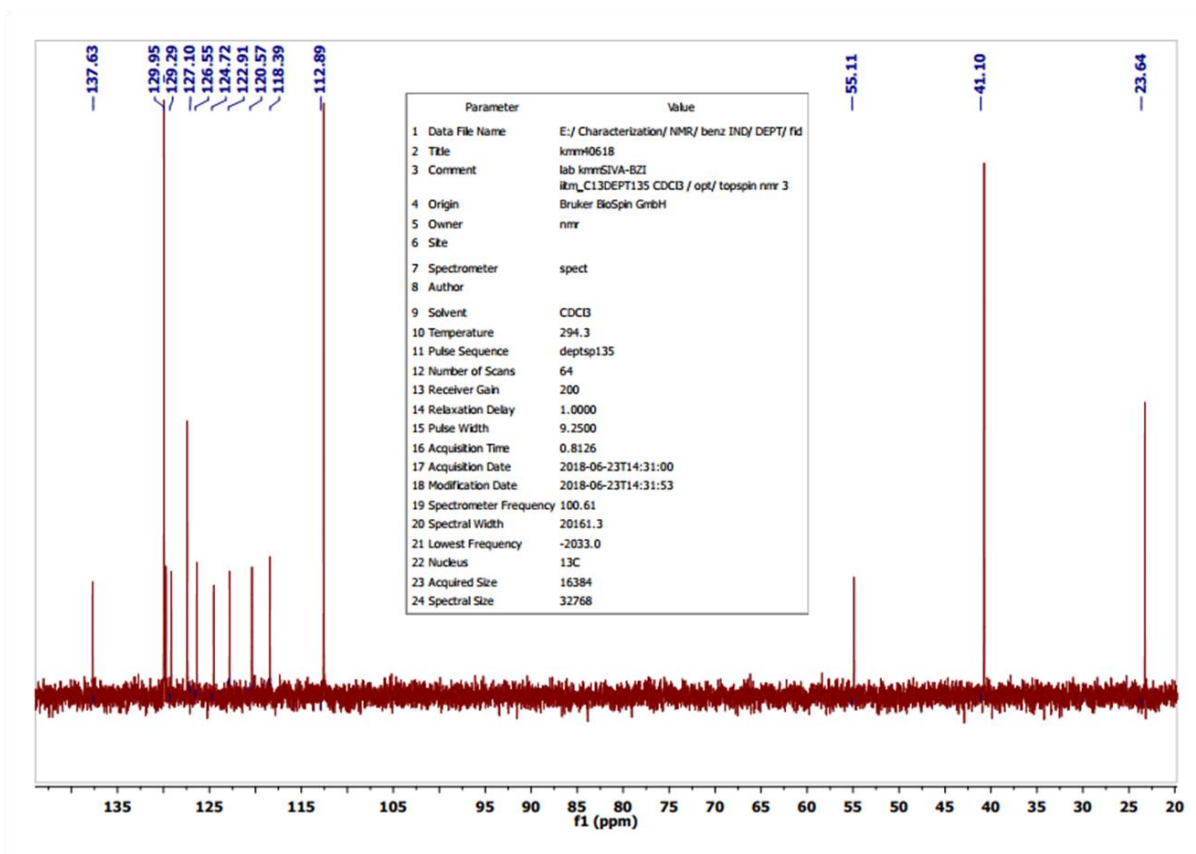

Fig. S35 DEPT-135 of **BInMBD** (100MHz, CDCl<sub>3</sub>).

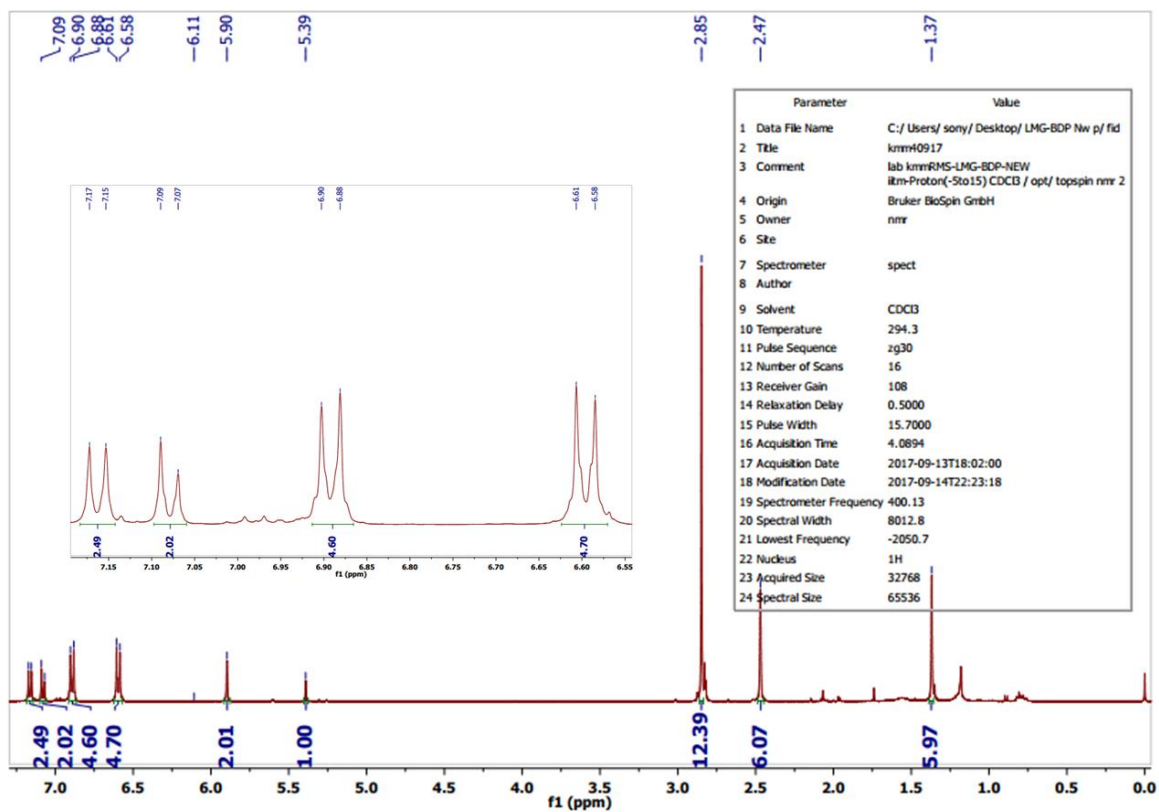

Fig. S36  $^1\text{H}$  NMR spectrum of **BDPMBD** (400 MHz,  $\text{CDCl}_3$ ).

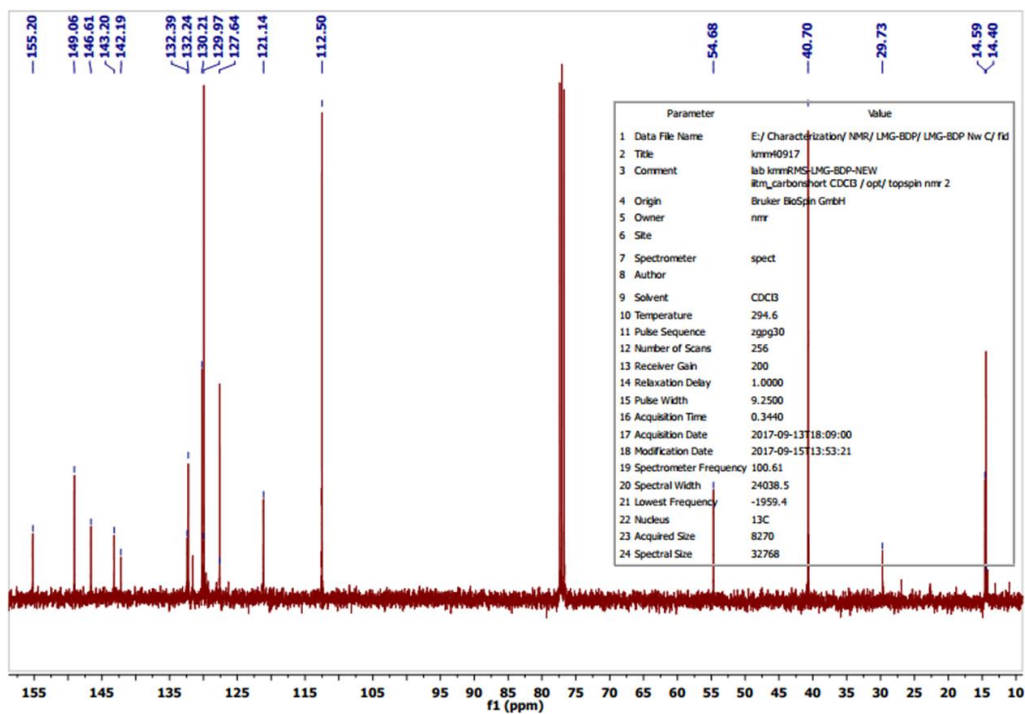

Fig. S37  $^{13}\text{C}$  NMR spectrum of **BDPMBD** (100 MHz,  $\text{CDCl}_3$ ).



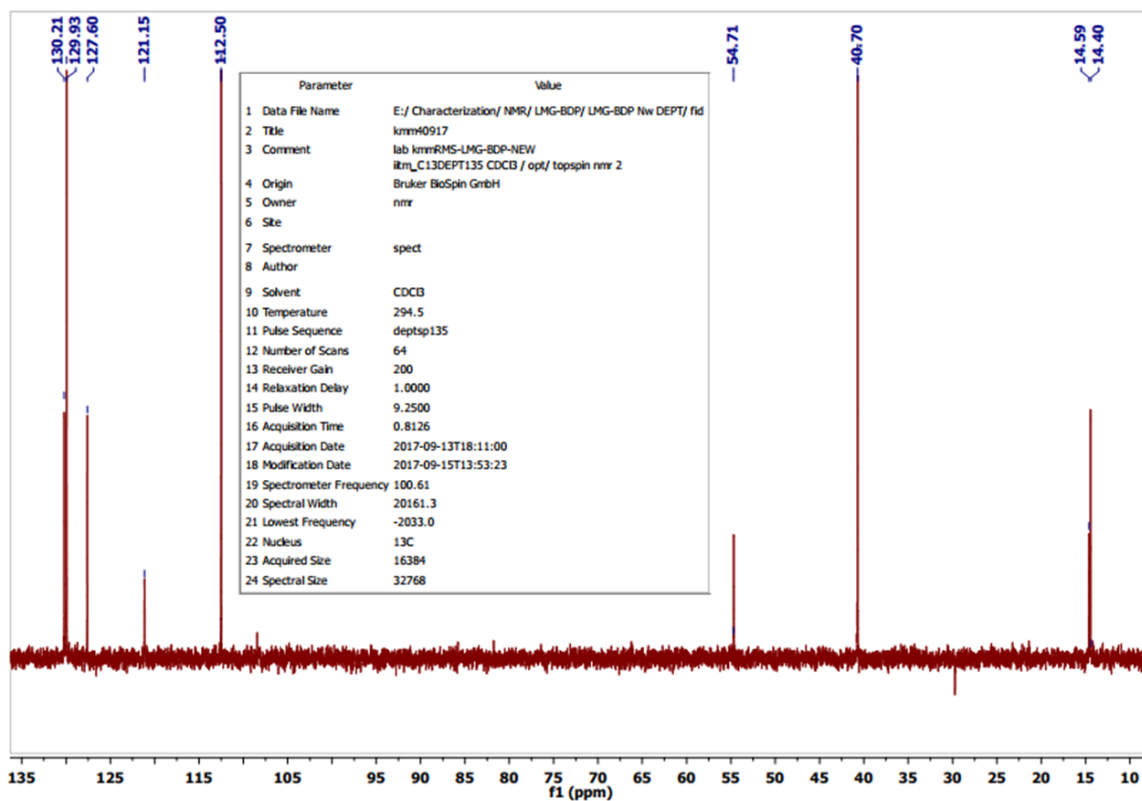

Fig. S38 DEPT-135 of **BDPMBD** (100 MHz, CDCl<sub>3</sub>).

|                        |                                                     |                          |                                 |
|------------------------|-----------------------------------------------------|--------------------------|---------------------------------|
| Data File              | LMG.d                                               | Sample Name              | 100119-14-HMM-LMG               |
| Sample Type            | Sample                                              | Position                 | P2-B3                           |
| Instrument Name        | Instrument 1                                        | User Name                |                                 |
| Acq Method             | Direct Infusion_HPLC.m                              | Acquired Time            | 10-01-2019 11:03:53 (UTC+05:30) |
| IRM Calibration Status | Success                                             | DA Method                | Default.m                       |
| Comment                |                                                     |                          |                                 |
| Sample Group           |                                                     | Info.                    |                                 |
| Stream Name            | LC 1                                                | Acquisition Time (Local) | 10-01-2019 11:03:53 (UTC+05:30) |
| Acquisition SW Version | 6200 series TOF/6500 series Q-TOF B.08.00 (B8058.0) | QTOF Driver Version      | 8.00.00                         |
| QTOF Firmware Version  | 20.698                                              | Tune Mass Range Max.     | 3200                            |

Compound Table

| Compound Label             | RT    | Mass     | Abund | Formula      | Ygt Mass | Diff (ppm) | Hits (DB) |
|----------------------------|-------|----------|-------|--------------|----------|------------|-----------|
| Cpd 1: C24 H26 N2 O; 0.573 | 0.573 | 358.2064 | 5176  | C24 H26 N2 O | 358.2045 | 5.14       | 1         |

| Compound Label             | m/z      | RT    | Algorithm       | Mass     |
|----------------------------|----------|-------|-----------------|----------|
| Cpd 1: C24 H26 N2 O; 0.573 | 381.1944 | 0.573 | Find By Formula | 358.2064 |

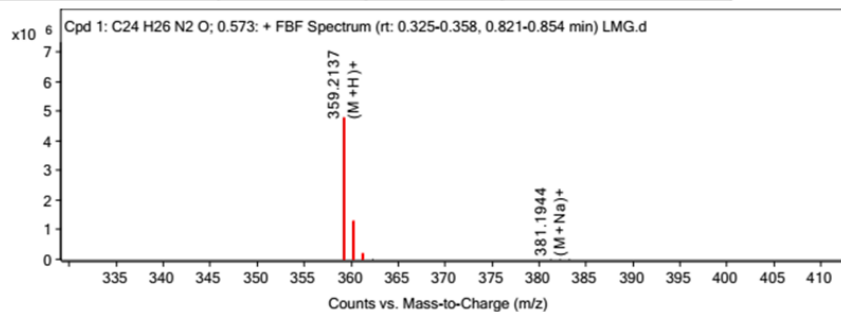

| m/z      | z | Abund      | Ion    |
|----------|---|------------|--------|
| 359.2127 | 1 | 477.866    | (M+H)+ |
| 360.2165 | 1 | 1243241.13 | (M+H)+ |
| 361.2191 | 1 | 149555.81  | (M+H)+ |
| 362.222  | 1 | 11587.34   | (M+H)+ |
| 381.1944 | 1 | 5175.76    | (M+N)+ |
| 382.1978 | 1 | 1408.94    | (M+N)+ |
| 383.2001 | 1 | 341.97     | (M+N)+ |

Fig. S39 Mass spectrum of LMG-CHO.

|                        |                                                     |                          |                                 |
|------------------------|-----------------------------------------------------|--------------------------|---------------------------------|
| Data File              | 25IND.d                                             | Sample Name              | 250618-05-13MM-IND              |
| Sample Type            | Sample                                              | Position                 | P2-A5                           |
| Instrument Name        | Instrument 1                                        | User Name                |                                 |
| Acq Method             | Direct Infusion_HPLC.m                              | Acquired Time            | 25-06-2018 12:14:06 (UTC+05:30) |
| IRM Calibration Status | Success                                             | DA Method                | Default.m                       |
| Comment                |                                                     |                          |                                 |
| Sample Group           |                                                     | Info.                    |                                 |
| Stream Name            | LC 1                                                | Acquisition Time (Local) | 25-06-2018 12:14:06 (UTC+05:30) |
| Acquisition SW Version | 6200 series TOF/6500 series Q-TOF B.08.00 (B8058.0) | QTOF Driver Version      | 8.00.00                         |
| QTOF Firmware Version  | 20.698                                              | Tune Mass Range Max.     | 3200                            |

Compound Table

| Compound Label           | RT    | Mass     | Abund   | Formula    | Tgt Mass | Diff (ppm) | Hits (DB) |
|--------------------------|-------|----------|---------|------------|----------|------------|-----------|
| Cpd 1: C35 H37 N3; 0.533 | 0.533 | 499.2998 | 3415605 | C35 H37 N3 | 499.2987 | 2.04       | 1         |

| Compound Label           | m/z     | RT    | Algorithm       | Mass     |
|--------------------------|---------|-------|-----------------|----------|
| Cpd 1: C35 H37 N3; 0.533 | 500.307 | 0.533 | Find By Formula | 499.2998 |

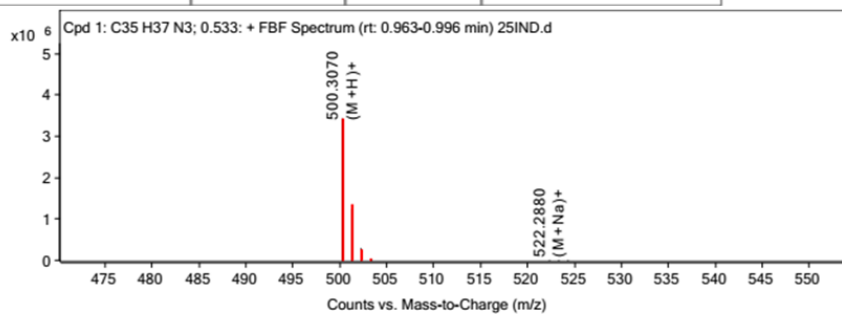

MS Spectrum Peak List

| m/z      | z | Abund      | Ion     |
|----------|---|------------|---------|
| 500.307  | 1 | 3415604.75 | (M+H)+  |
| 501.3101 | 1 | 1239005.38 | (M+H)+  |
| 502.3148 | 1 | 25882.37   | (M+H)+  |
| 503.3178 | 1 | 42441.5    | (M+H)+  |
| 522.288  | 1 | 8049.47    | (M+Na)+ |
| 523.2901 | 1 | 5275.8     | (M+Na)+ |
| 524.2942 | 1 | 4861.48    | (M+Na)+ |

Fig. S40 Mass spectrum of InMBD.

|                        |                                                      |                          |                                 |
|------------------------|------------------------------------------------------|--------------------------|---------------------------------|
| Data File              | BZ1.d                                                | Sample Name              | 030718-3-K094-BZ1               |
| Sample Type            | Sample                                               | Position                 | F1-03                           |
| Instrument Name        | Instrument 1                                         | User Name                |                                 |
| Acq Method             | Direct Infusion_HPLC.m                               | Acquired Time            | 03-07-2018 09:41:33 (UTC+05:30) |
| IRM Calibration Status | <b>Success</b>                                       | DA Method                | Default.m                       |
| Comment                |                                                      |                          |                                 |
| Sample Group           |                                                      | Info.                    |                                 |
| Stream Name            | LC 1                                                 | Acquisition Time (Local) | 03-07-2018 09:41:33 (UTC+05:30) |
| Acquisition SW Version | 6.200 series TOF/6500 series Q-TOF 8.08.00 (B8058.0) | QTOF Driver Version      | 8.00.00                         |
| QTOF Firmware Version  | 20.698                                               | Tune Mass Range Max.     | 3200                            |

Compound Table

| Compound Label           | RT    | Mass     | Abund   | Formula    | Tgt Mass | Diff (ppm) | Hits (DB) |
|--------------------------|-------|----------|---------|------------|----------|------------|-----------|
| Cpd 1: C39 H39 N3; 0.252 | 0.252 | 549.3142 | 1435818 | C39 H39 N3 | 549.3144 | -0.31      | 1         |

| Compound Label           | <b>mp</b> | RT    | Algorithm       | Mass     |
|--------------------------|-----------|-------|-----------------|----------|
| Cpd 1: C39 H39 N3; 0.252 | 550.3214  | 0.252 | Find By Formula | 549.3142 |

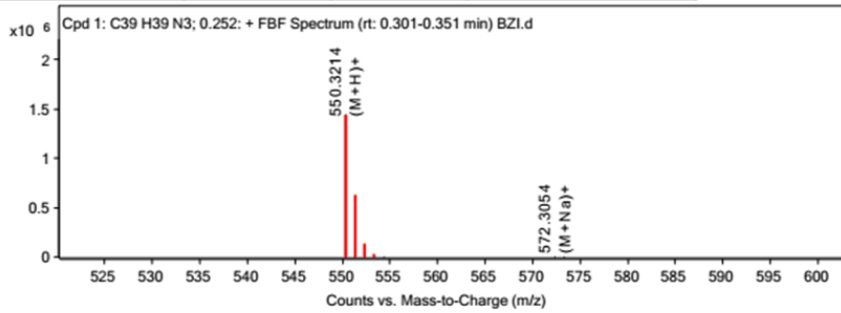

| <b>mp</b> | <i>z</i> | Abund      | Ion     |
|-----------|----------|------------|---------|
| 550.3214  | 1        | 1435817.80 | (M+H)+  |
| 551.3252  | 1        | 557335     | (M+H)+  |
| 552.3276  | 1        | 188794.31  | (M+H)+  |
| 553.3300  | 1        | 15500.25   | (M+H)+  |
| 554.3324  | 1        | 1938.20    | (M+H)+  |
| 572.3054  | 1        | 685.90     | (M+N2)+ |
| 573.3091  | 1        | 200.89     | (M+N2)+ |

Fig. S41 Mass spectrum of BInMBD.

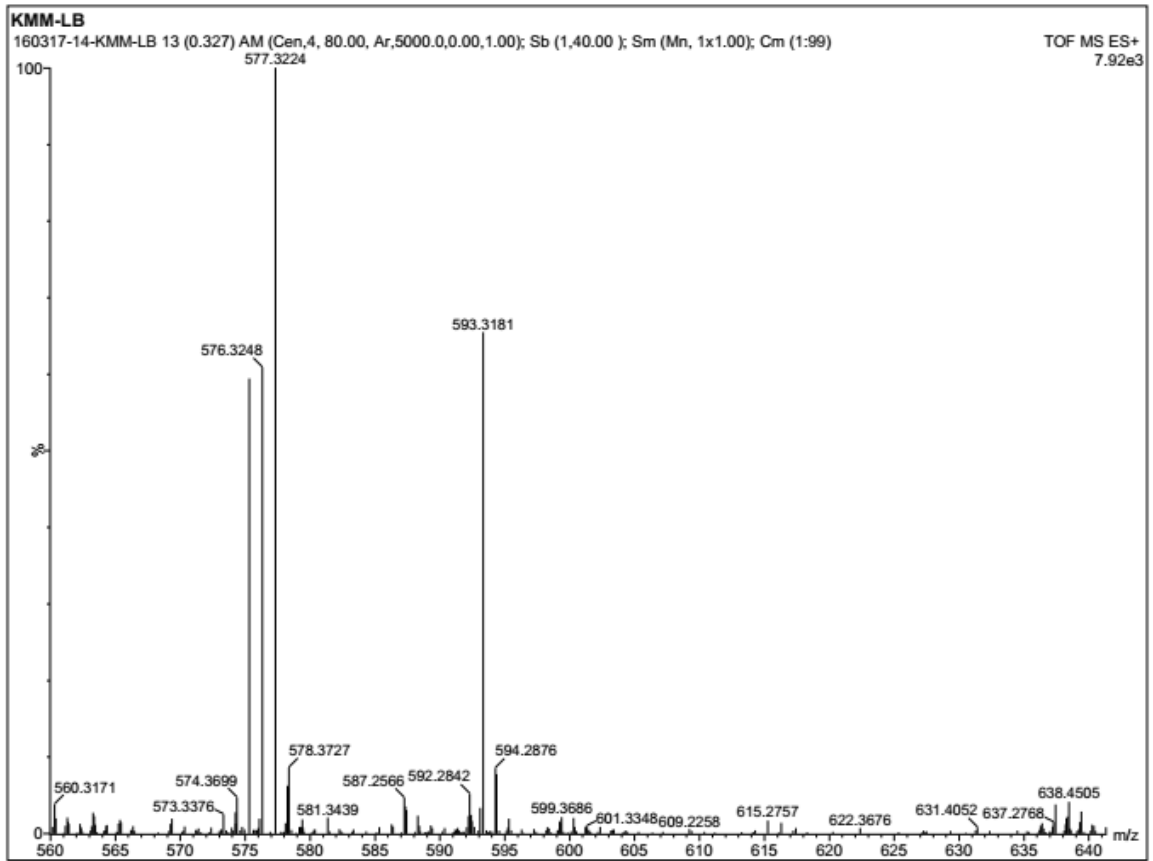

**Fig. S42** Mass spectrum of **BDPMBD**.
